# Supplementary material for: Attribution of European precipitation and temperature trends to changes in synoptic circulation
Source: Copernicus journal article supplement (doi:10.5194/hess-19-3093-2015), 2015-07-13
Supplement: Supplementary file 2 [file hess-19-3093-2015-supplement.pdf]

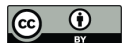

*Supplement of*

## **Attribution of European precipitation and temperature trends to changes in synoptic circulation**

**A. K. Fleig et al.**

*Correspondence to:* A. K. Fleig (afl@nve.no)

The copyright of individual parts of the supplement might differ from the CC-BY 3.0 licence.

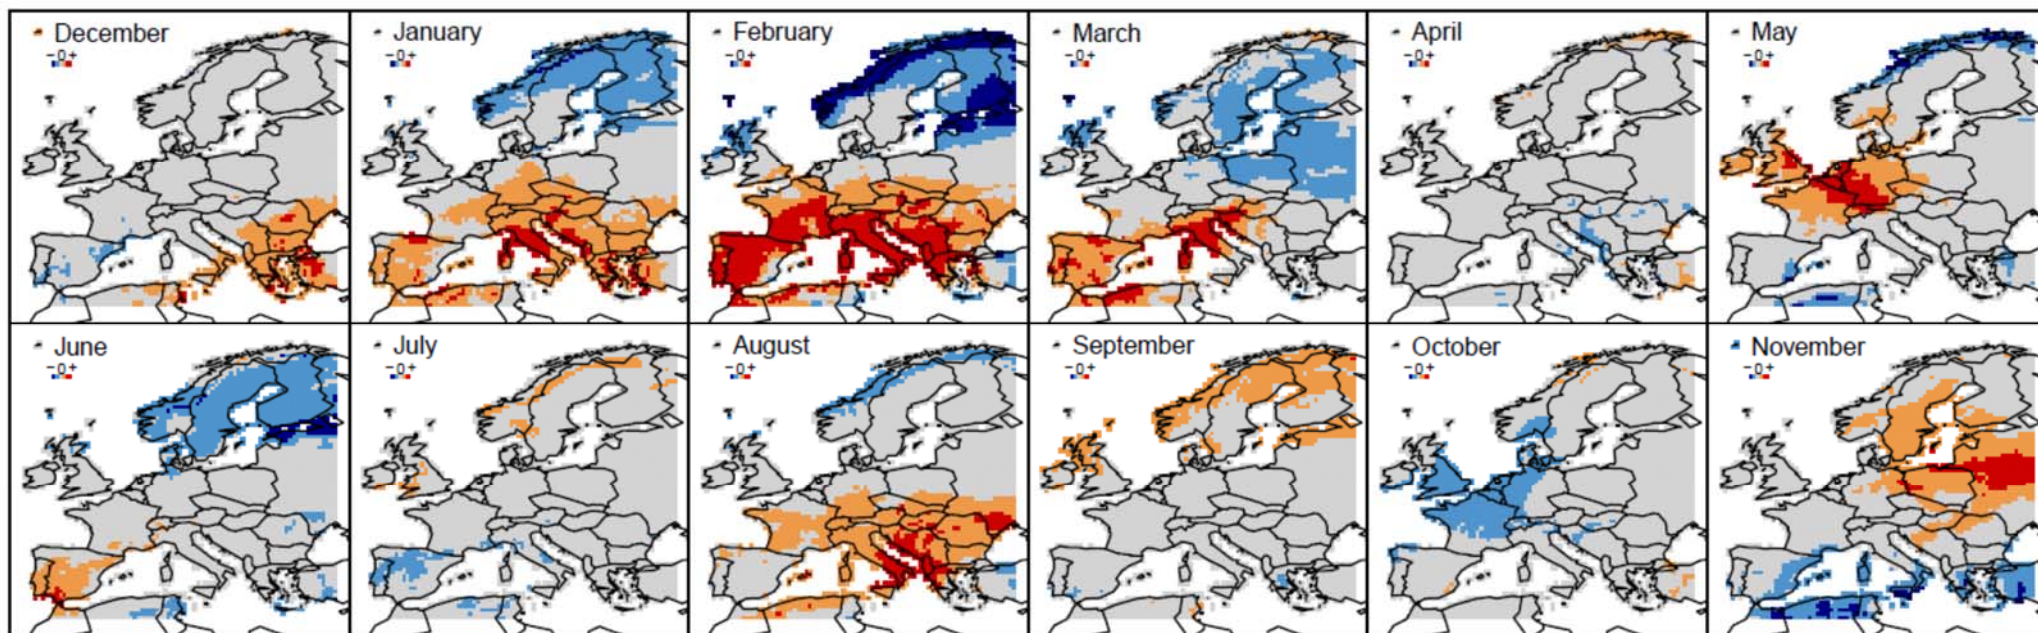

Figure S1. Monthly frequency trends in dry STs significant at the 70% (light colours) and 95% (dark colours); increasing trends in red, decreasing trends in blue.

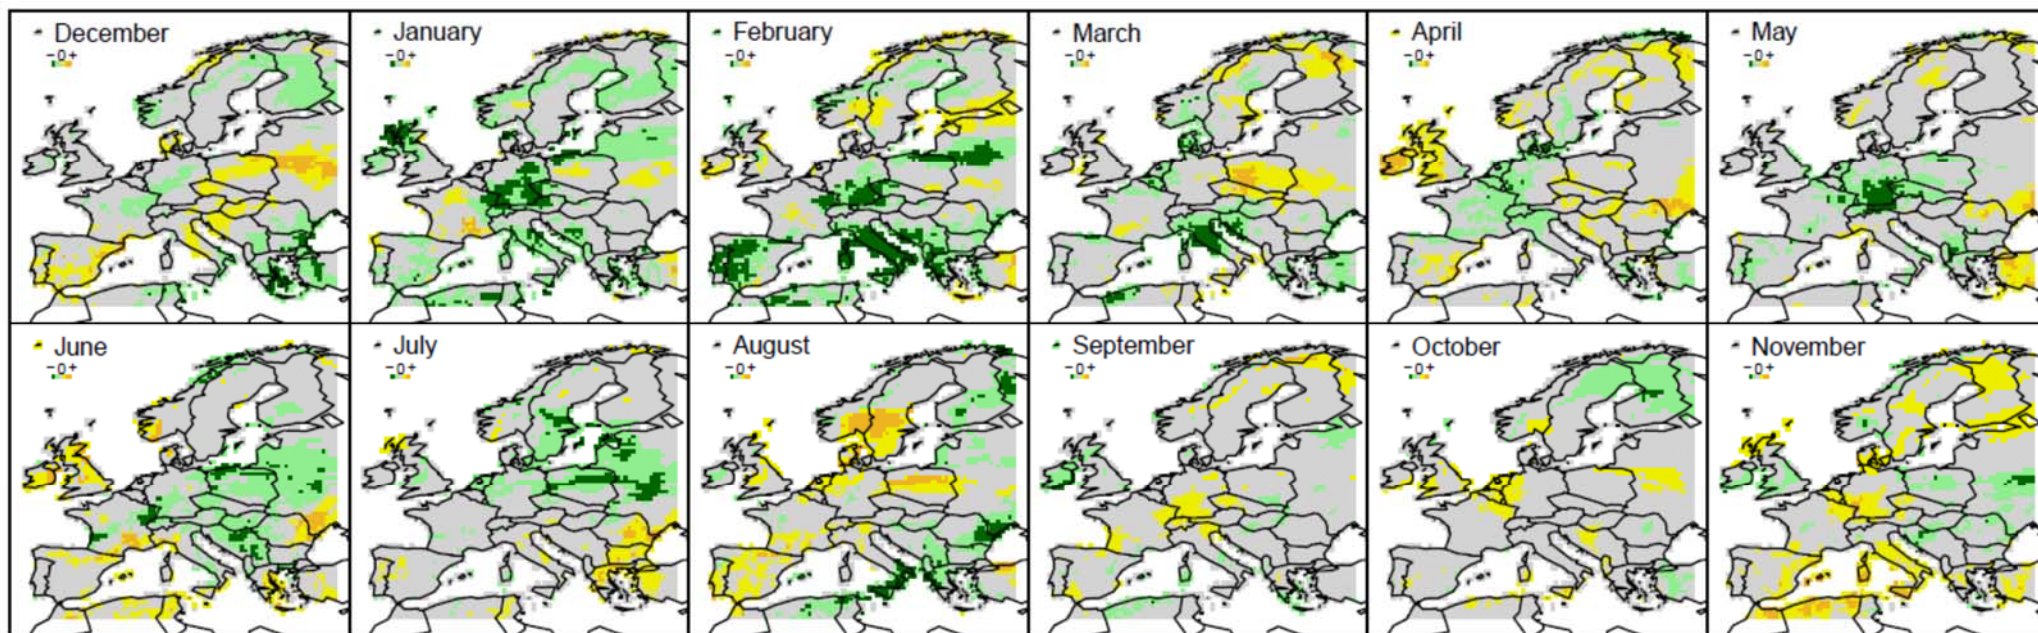

Figure S2. Monthly frequency trends in average-P STs significant at the 70% (light colours) and 95% (dark colours); increasing trends in yellow, decreasing trends in green.



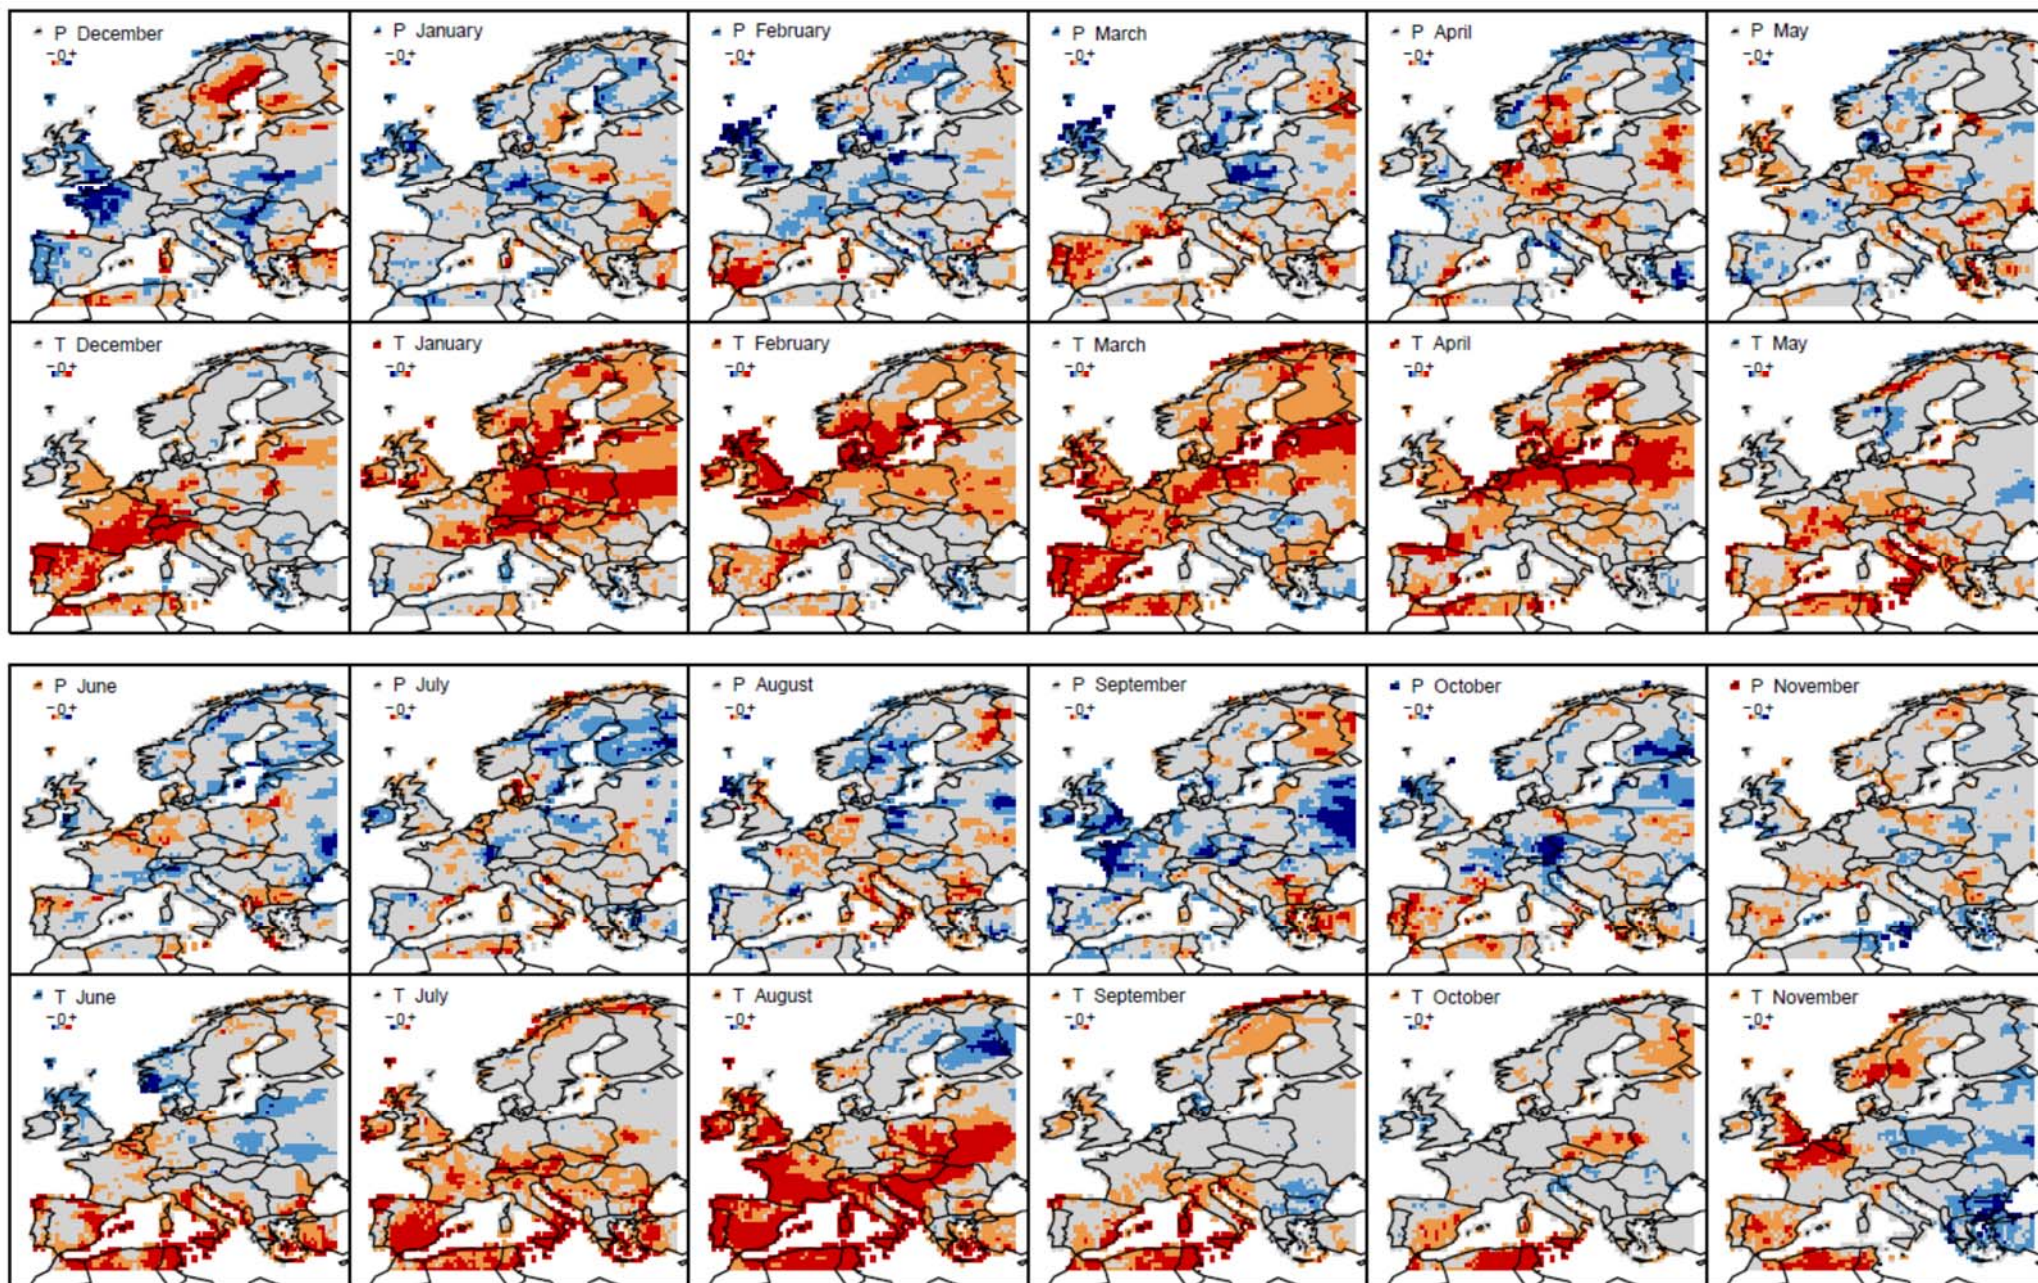

Figure S3. Monthly trends within the groups of average STs for precipitation (rows 1 and 3) and temperature (rows 2 and 4) significant at the 70% (light colours) and 95% (dark colours). Precipitation: increasing trends in blue, decreasing trends in red. Temperature: increasing trends in red, decreasing trends in blue.



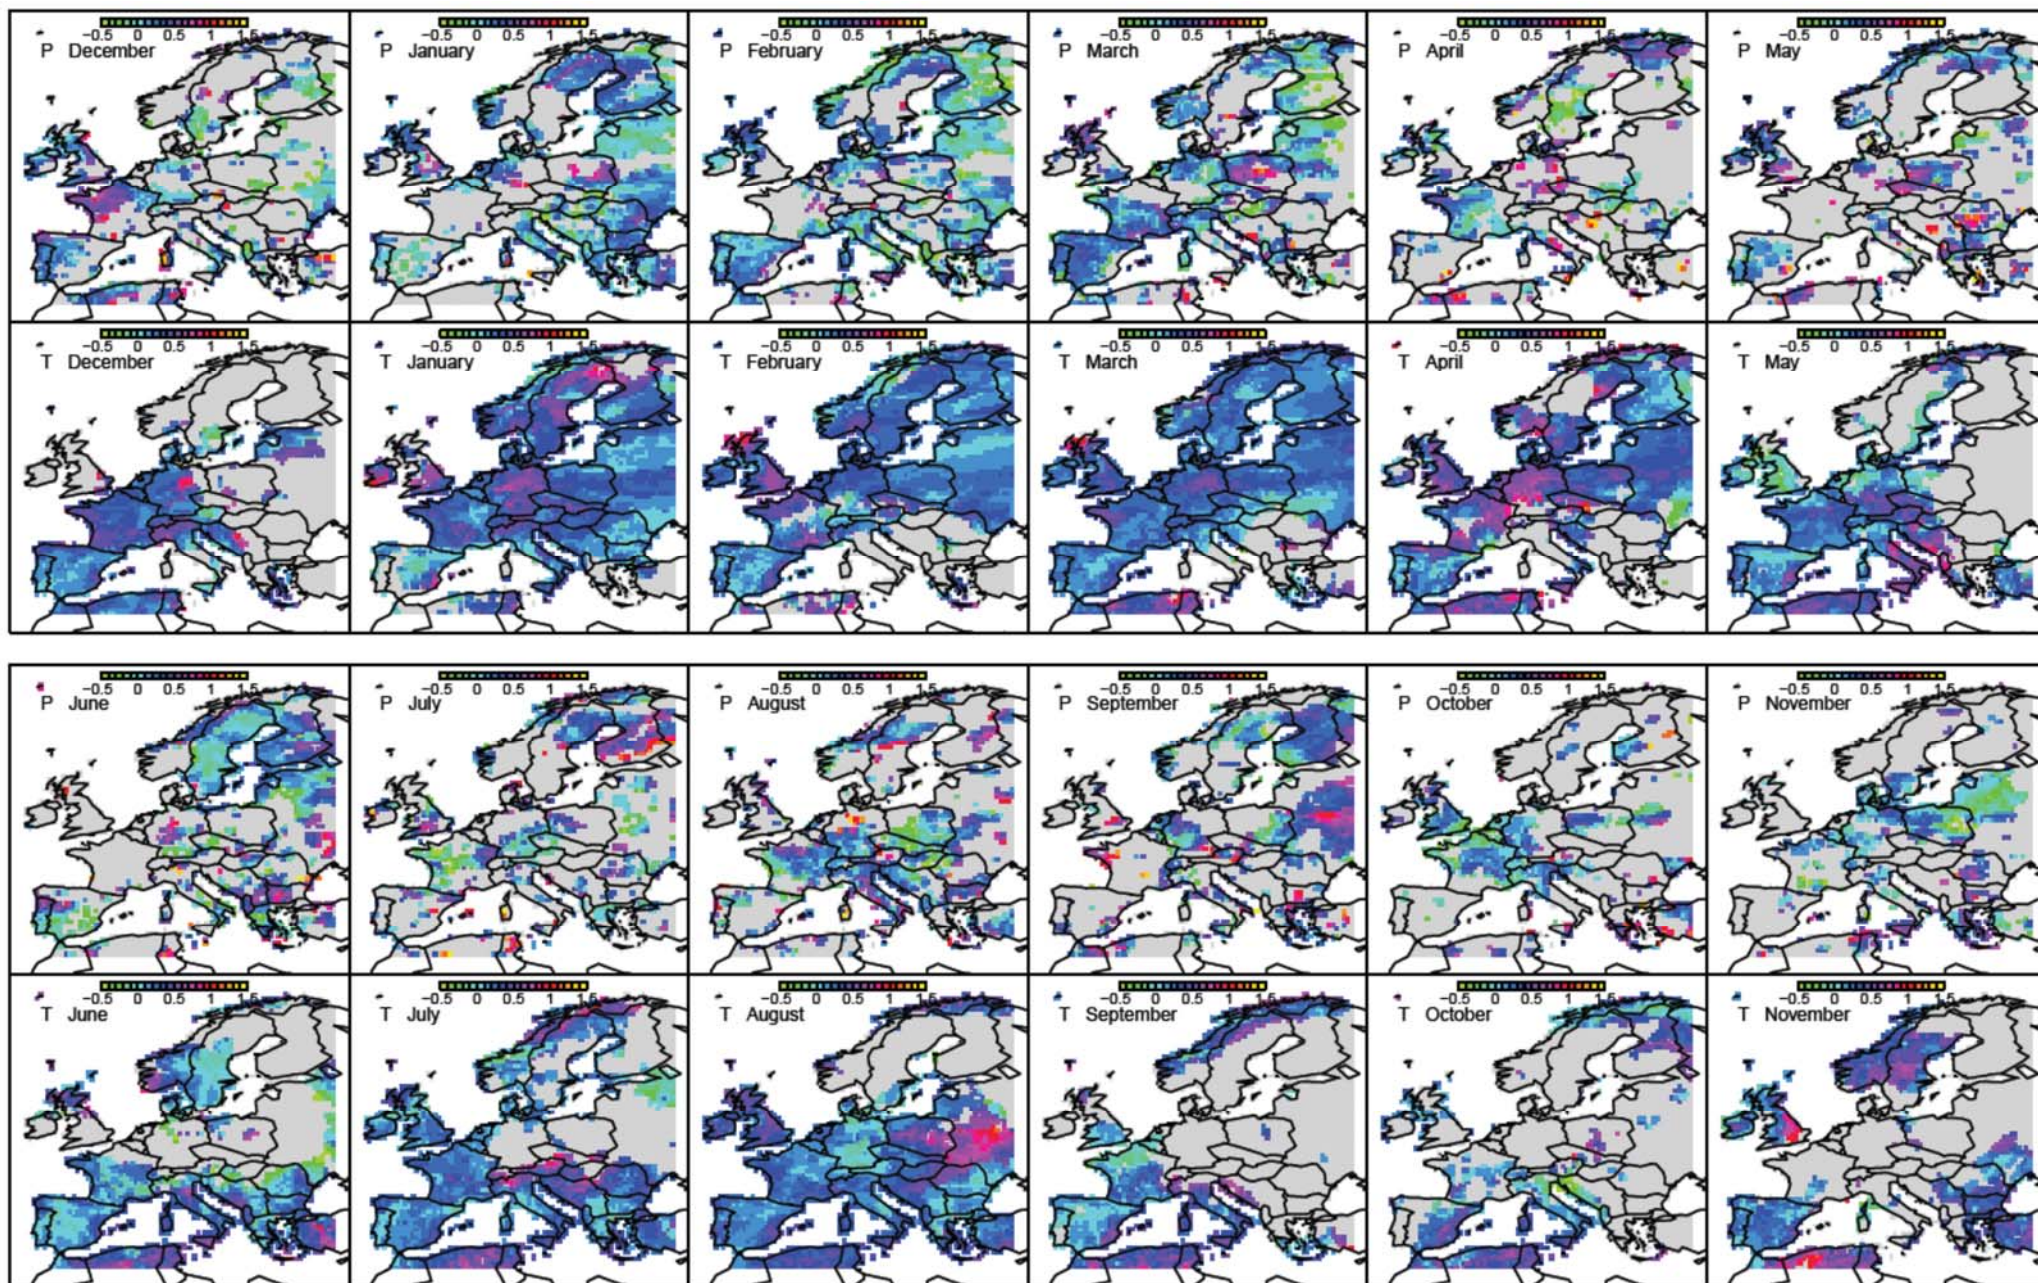

Figure S4. Monthly trend ratios for trends within the groups of average STs for precipitation (rows 1 and 3) and temperature (rows 2 and 4).
